# Supplementary material
Source: MDPI journal article supplement (https://www.mdpi.com/2673-4109/1/3/11)
Supplement: s1 [file s1]

I. Presentations of equipments used in this study

|                                                                                     |                                                                                      |
|-------------------------------------------------------------------------------------|--------------------------------------------------------------------------------------|
| 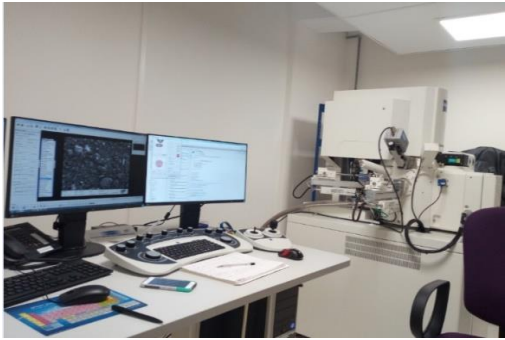   |    |
| Scanning Electron Microscopy (SEM) apparatus at LM2GC                               | Deformation data acquisition unit                                                    |
|   |   |
| Vacuum water porosity meter                                                         | Equipment of Hot-Disk TPS 1500, probes and sample fixtures                           |
|  |  |
| Cembureau gas permeability test set-up                                              | The semi-automatic polishing machine used                                            |

II. II. Presentation of some images of curing of concrete samples

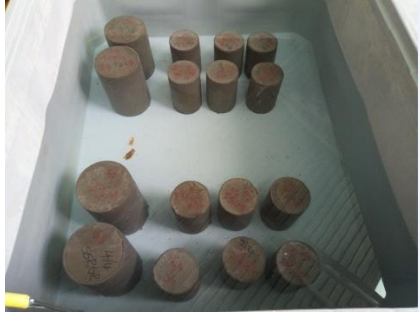

The storage curing of specimens for 90-day tests

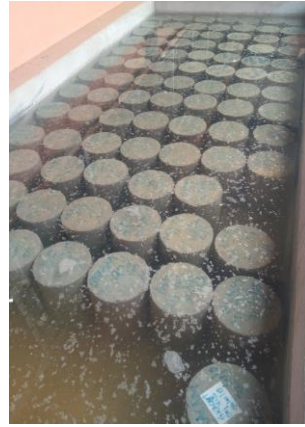

The storage curing of specimens for 7, 21- and 28-day tests
